# Supplementary material for: Dissolution of Carbonate Rocks in a Laboratory Setting: Rates and Textures
Source: MDPI journal article supplement (doi:10.3390/min11060605), 2021-06-05
Supplement: s1 [file s1]

## Article

# Dissolution of Carbonate Rocks in a Laboratory Setting: Rates and Textures

Erik B. Larson <sup>1,\*</sup> and Ronald V. Emmons <sup>1,2</sup><sup>1</sup> Department of Natural Sciences, Shawnee State University, 940 Second St, Portsmouth, OH 45662, USA; Ronald.Emmons@rockets.utoledo.edu<sup>2</sup> Department of Chemistry and Biochemistry, The University of Toledo, 2801 W. Bancroft St, Toledo, OH 43606, USA

\* Correspondence: elarson@shawnee.edu; Tel.: +1-740-351-3144

## Supplementary Material

**Citation:** Larson, E.B.; Emmons, R.V. Dissolution of Carbonate Rocks in a Laboratory Setting: Rates and Textures. *Minerals* **2021**, *11*, 605. <https://doi.org/10.3390/min11060605>

Academic Editors: Barbara Woronko and Maciej Dąbski

Received: 28 April 2021

Accepted: 2 June 2021

Published: 5 June 2021

**Publisher's Note:** MDPI stays neutral with regard to jurisdictional claims in published maps and institutional affiliations.

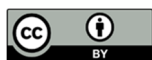

**Copyright:** © 2021 by the authors. Licensee MDPI, Basel, Switzerland. This article is an open access article distributed under the terms and conditions of the Creative Commons Attribution (CC BY) license (<http://creativecommons.org/licenses/by/4.0/>).

$$\text{Dissolution Rate} = \frac{V dc}{A dt} = \mu\text{mol cm}^{-2} \text{min}^{-1}$$

After a simple conversion of minutes to a given extrapolated time span, denudation can be calculated by simply dividing the result by the molar density of the bulk rock sample:

$$\text{Calcium molar density} = \frac{\text{Sample density } (\frac{\text{g}}{\text{cm}^3})}{\text{Calcium molar mass } (\frac{\text{g}}{\text{mol}})} = \frac{\text{mol}}{\text{cm}^3}$$

The result naturally being converting into  $\mu\text{mol}/\text{cm}^3$ . This allows a denudation rate to be calculated in conventional terms of distance/time while accounting for the geometric surface area of the bulk rock sample.

**Table S1.** Explanation of the units used from the raw data collected to calculate denudation rate.

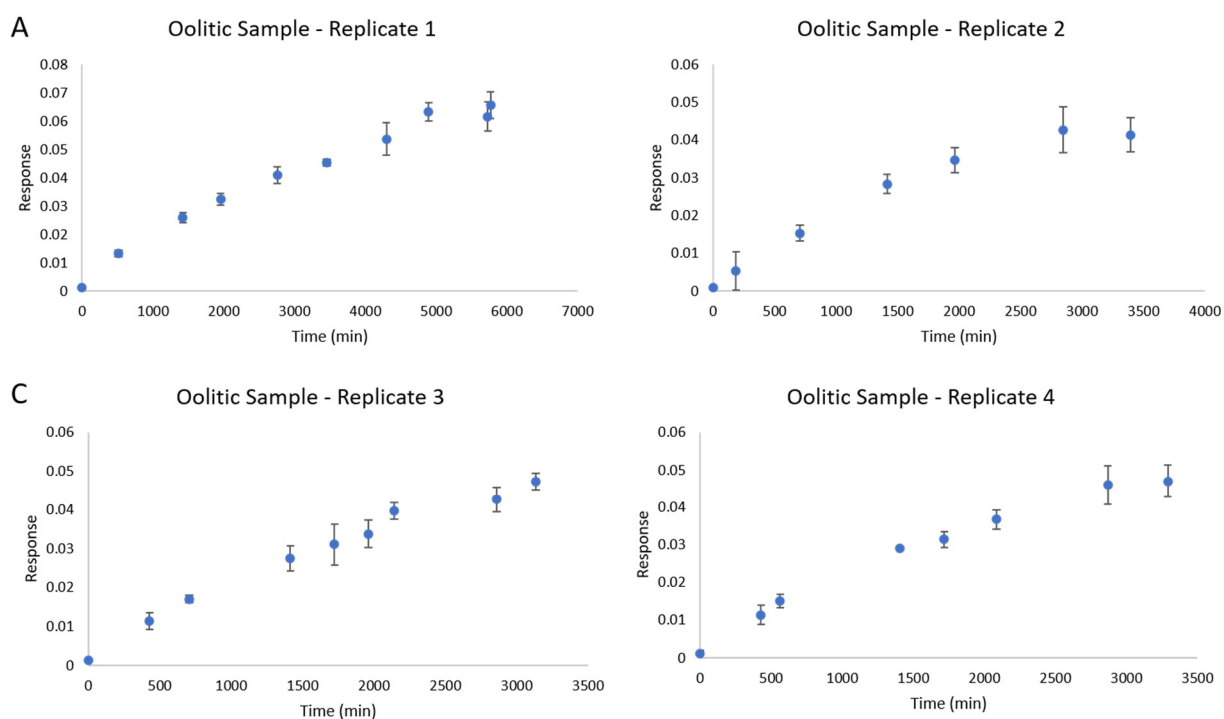

**Figure S1.** AES data for each experimental replicate of the oolitic limestone sample.

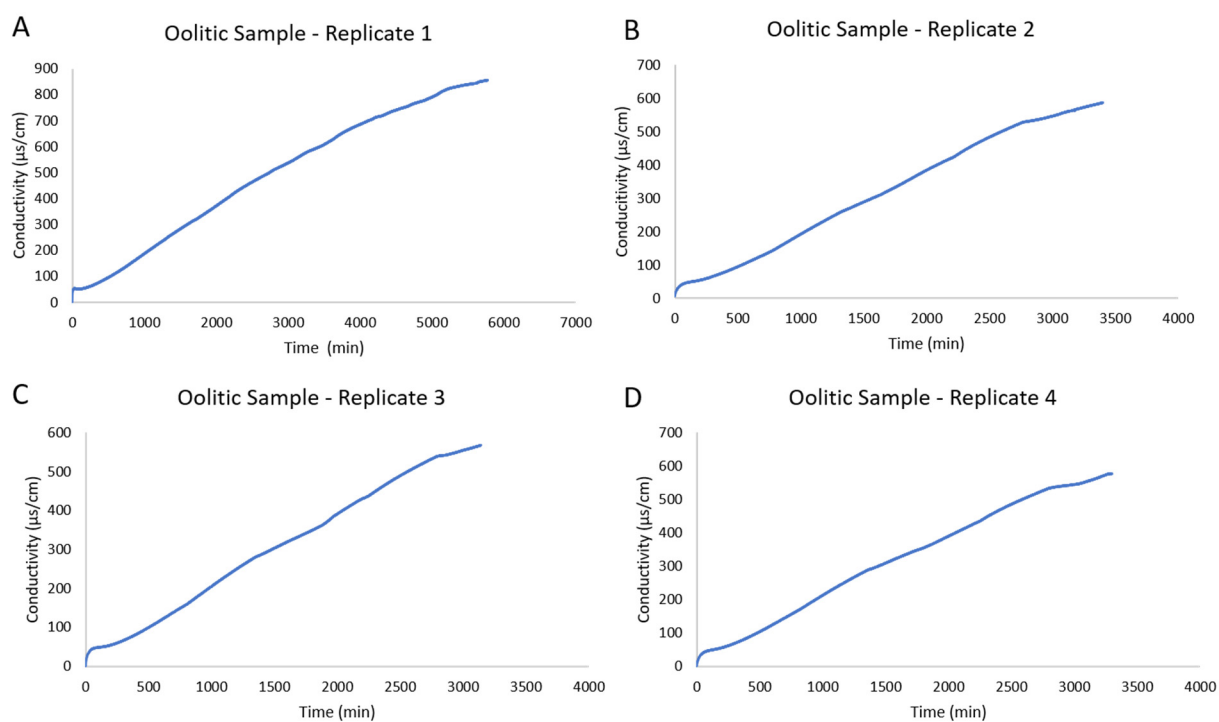

**Figure S2.** Conductivity data for each experimental replicate of the Oolitic limestone sample.

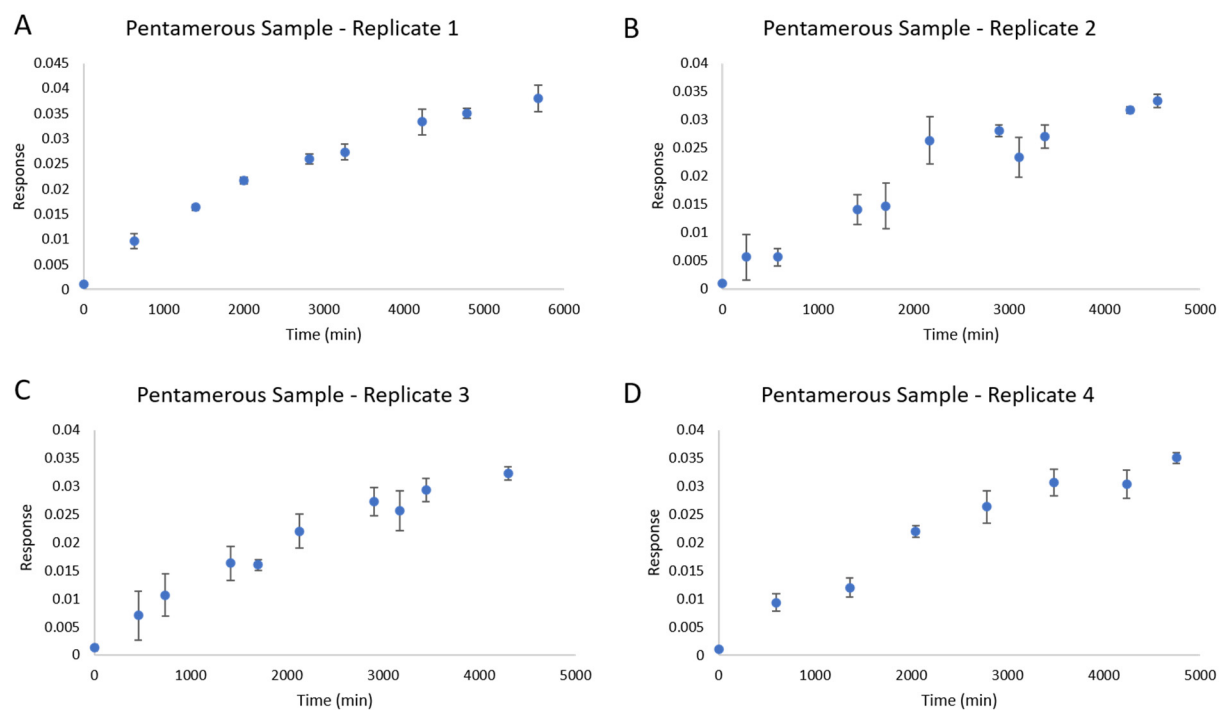

**Figure S3.** AES data for each experimental replicate of the Pentamerous limestone (dolostone) sample.

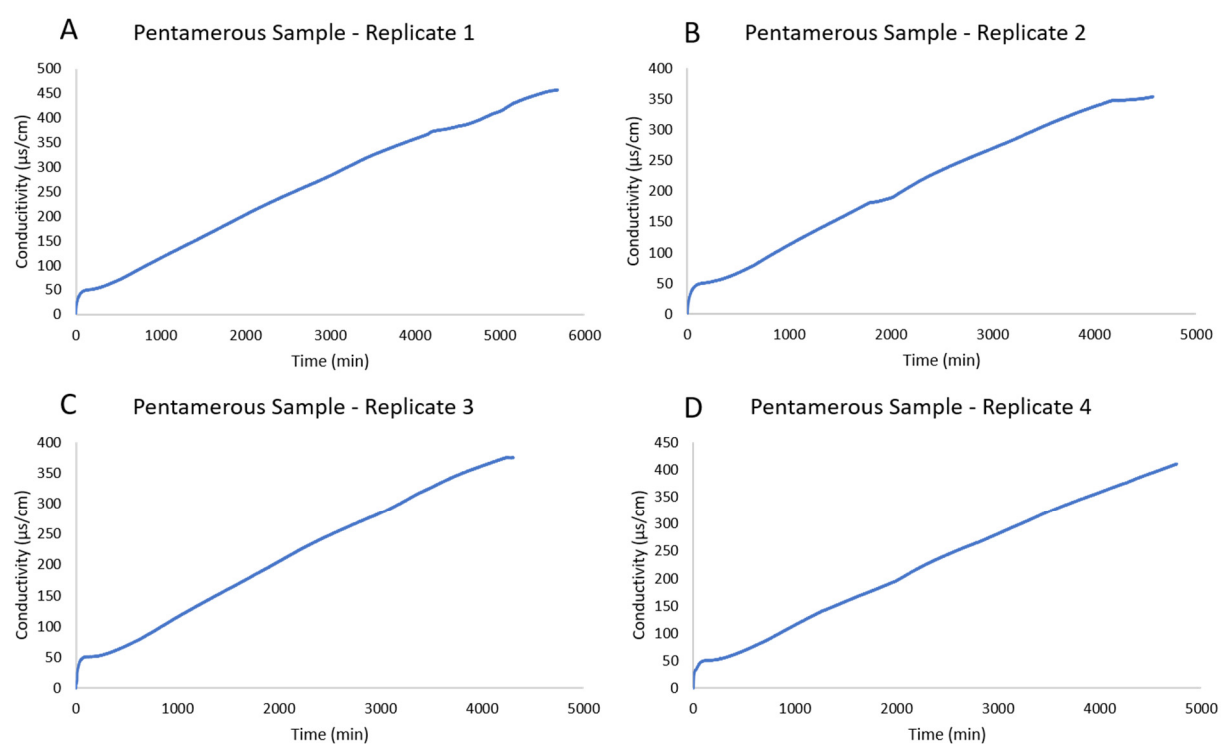

**Figure S4.** Conductivity data for each experimental replicate of the Pentamerous limestone (dolostone) sample.
